# Supplementary figures and images for: Interaction between Sulfate and Selenate in Tetraploid Wheat (Triticum turgidum L.) Genotypes
Source: MDPI journal article supplement (doi:10.3390/ijms24065443), 2023-03-13

Figure S1

S0

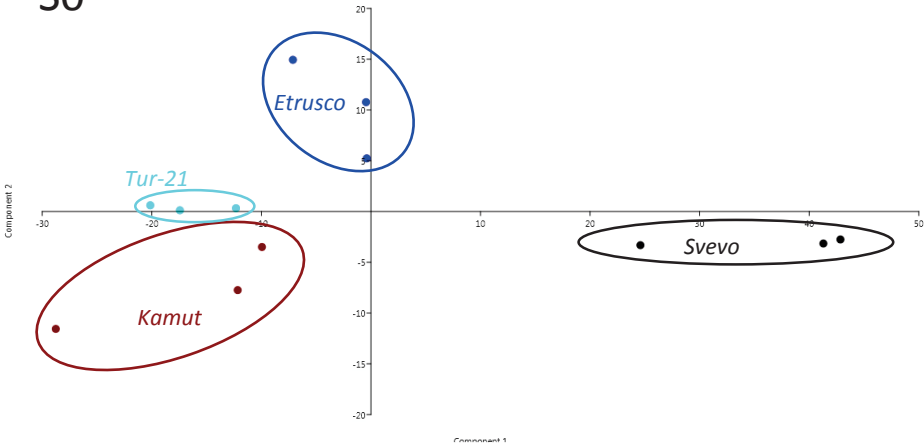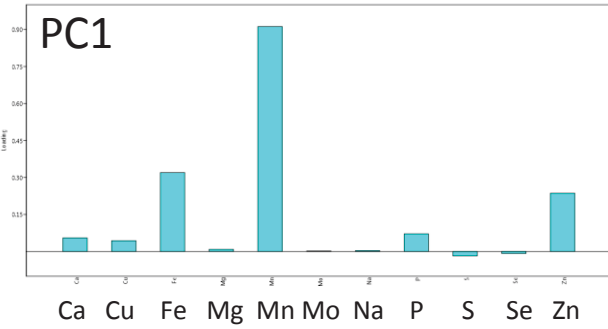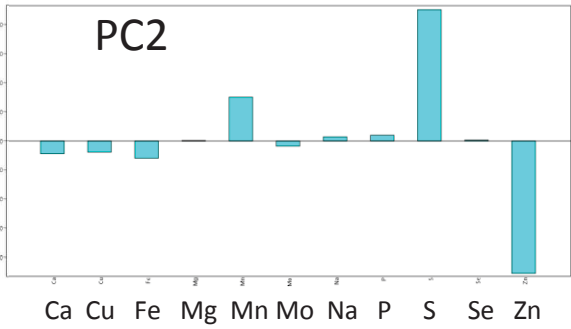

L0

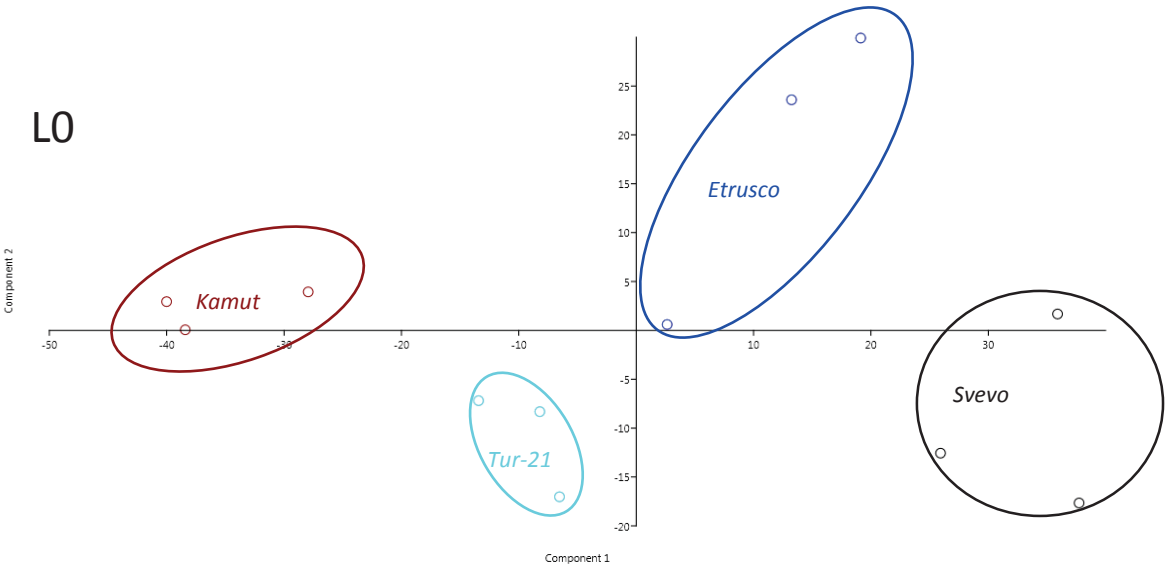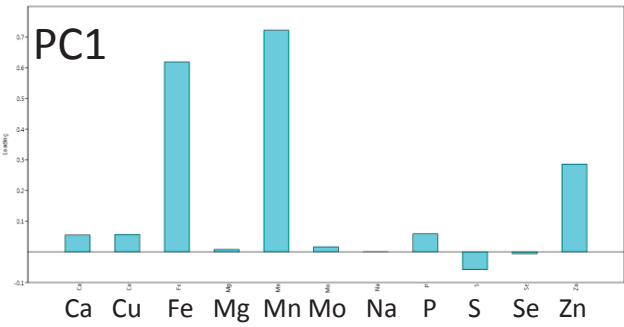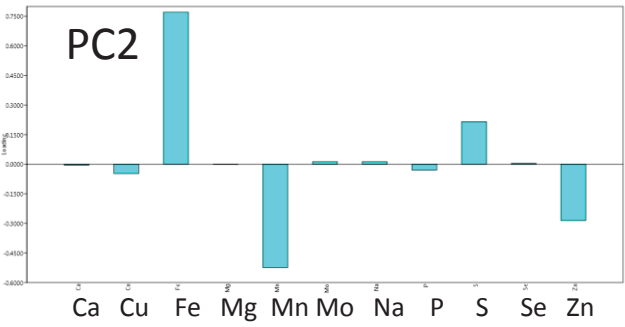

# S10

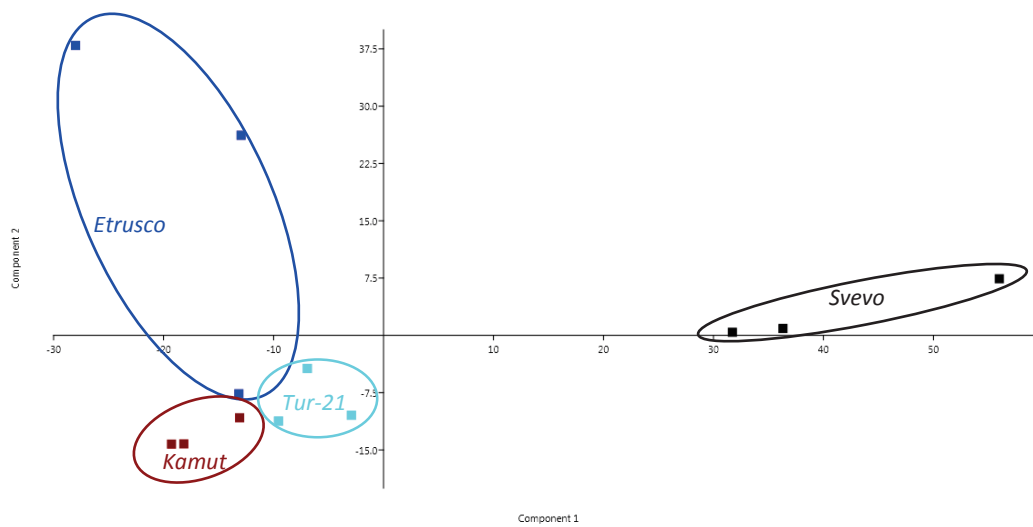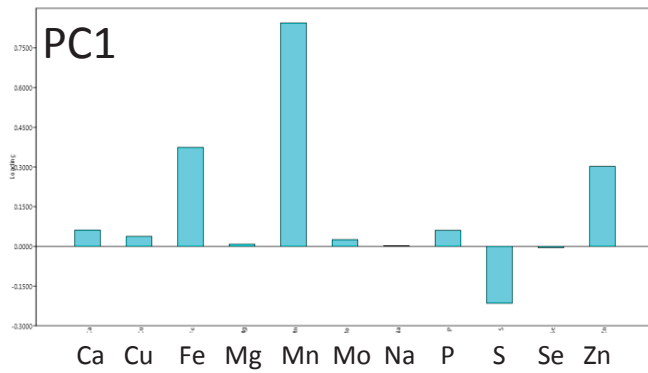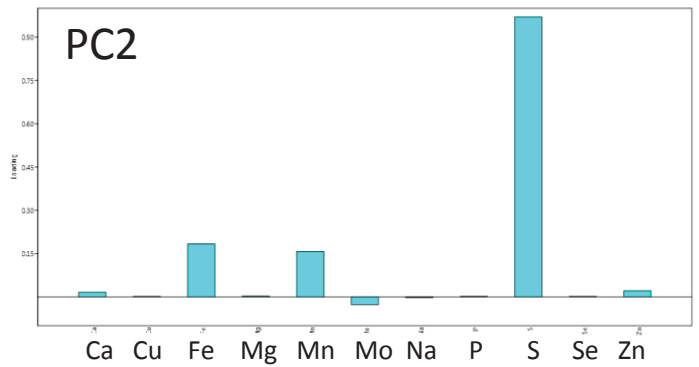

# L10

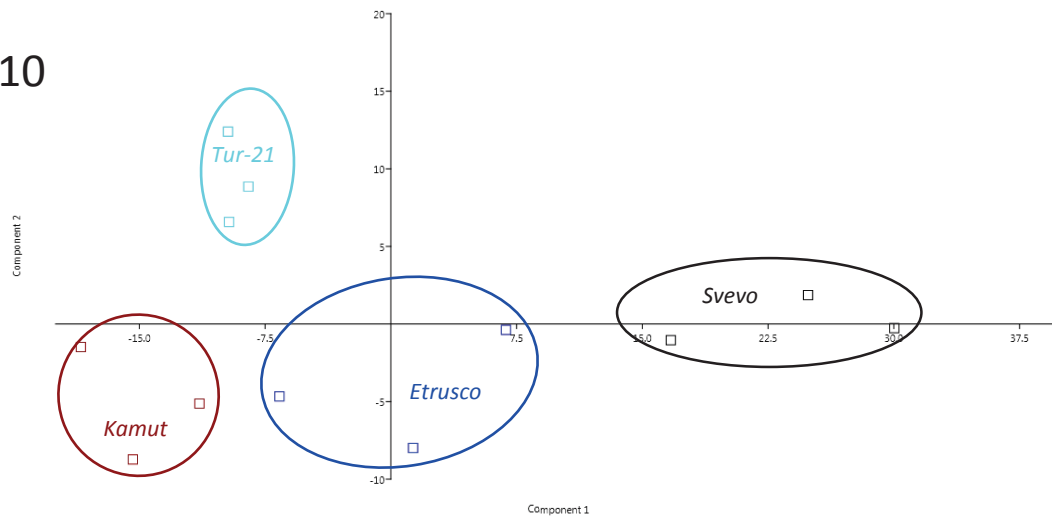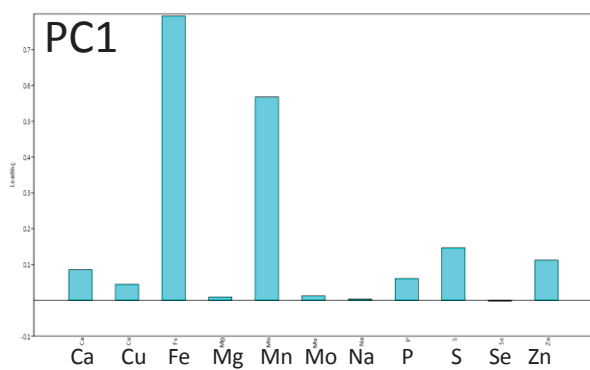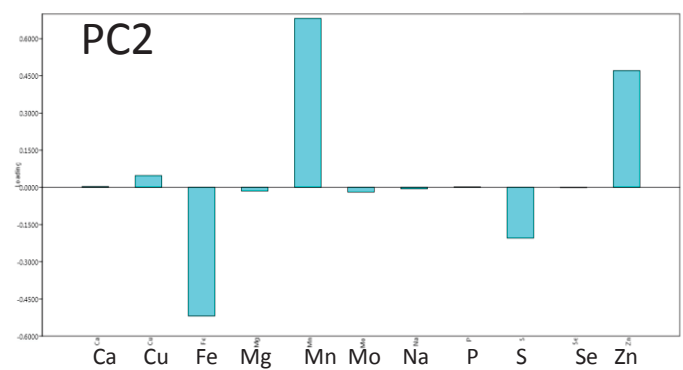

S50

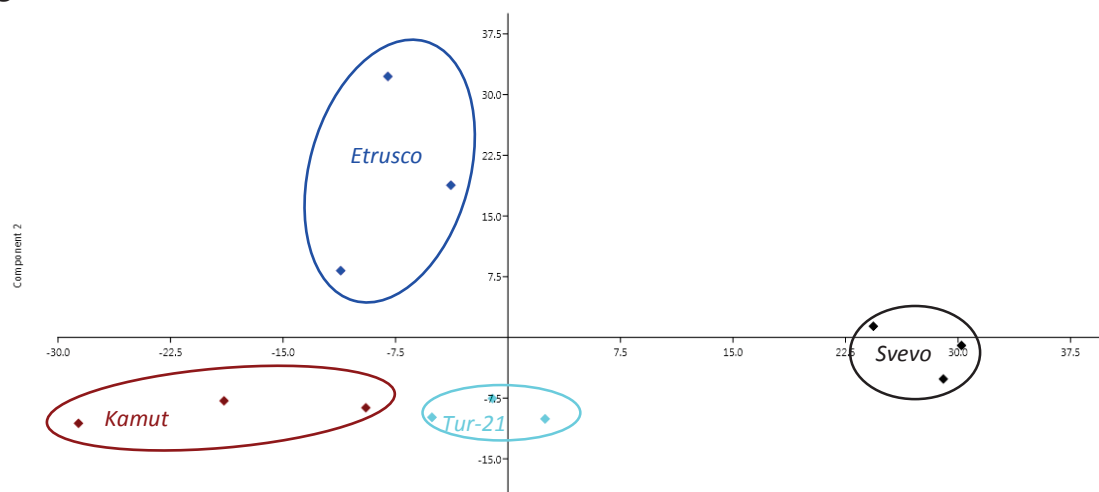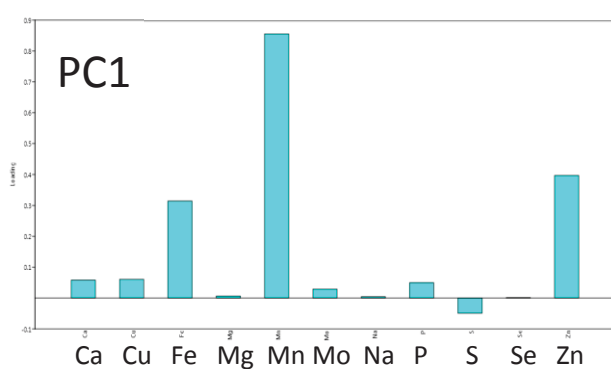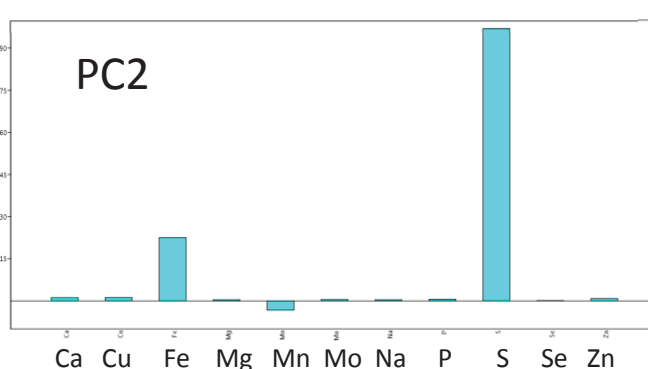

L50

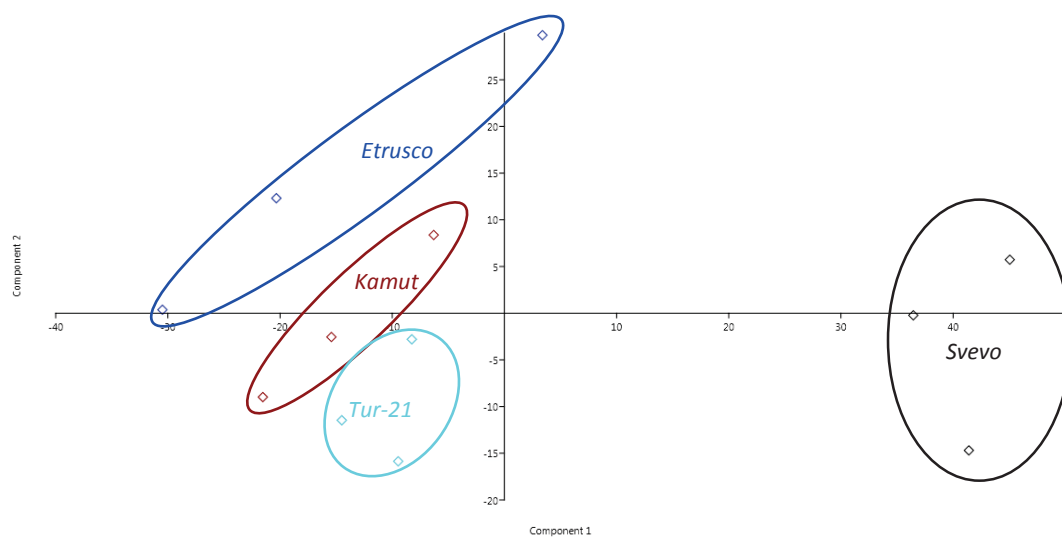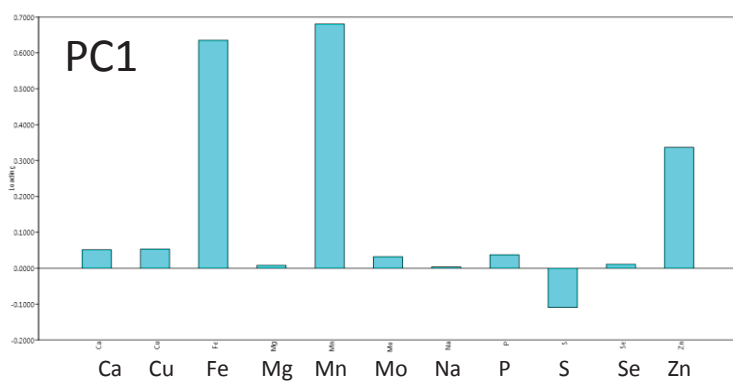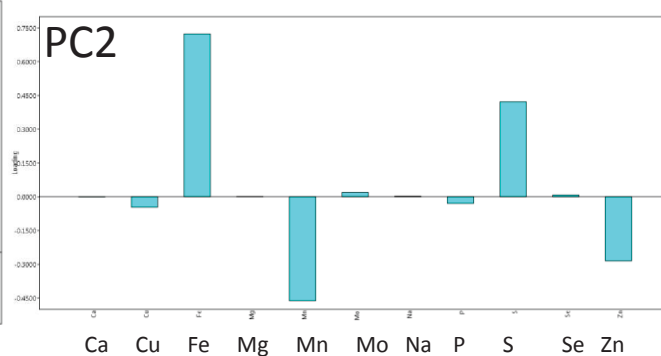

Supplement: s1 [file s1]
